# Supplementary material for: Fundamental studies of methanol synthesis from CO2 hydrogenation on Cu(111), Cu clusters, and Cu/ZnO(0001)
Source: Royal Society of Chemistry journal article supplement (doi:10.1039/c001484b), 2010-01-01
Supplement: c001484b.pdf [file c001484b.pdf]

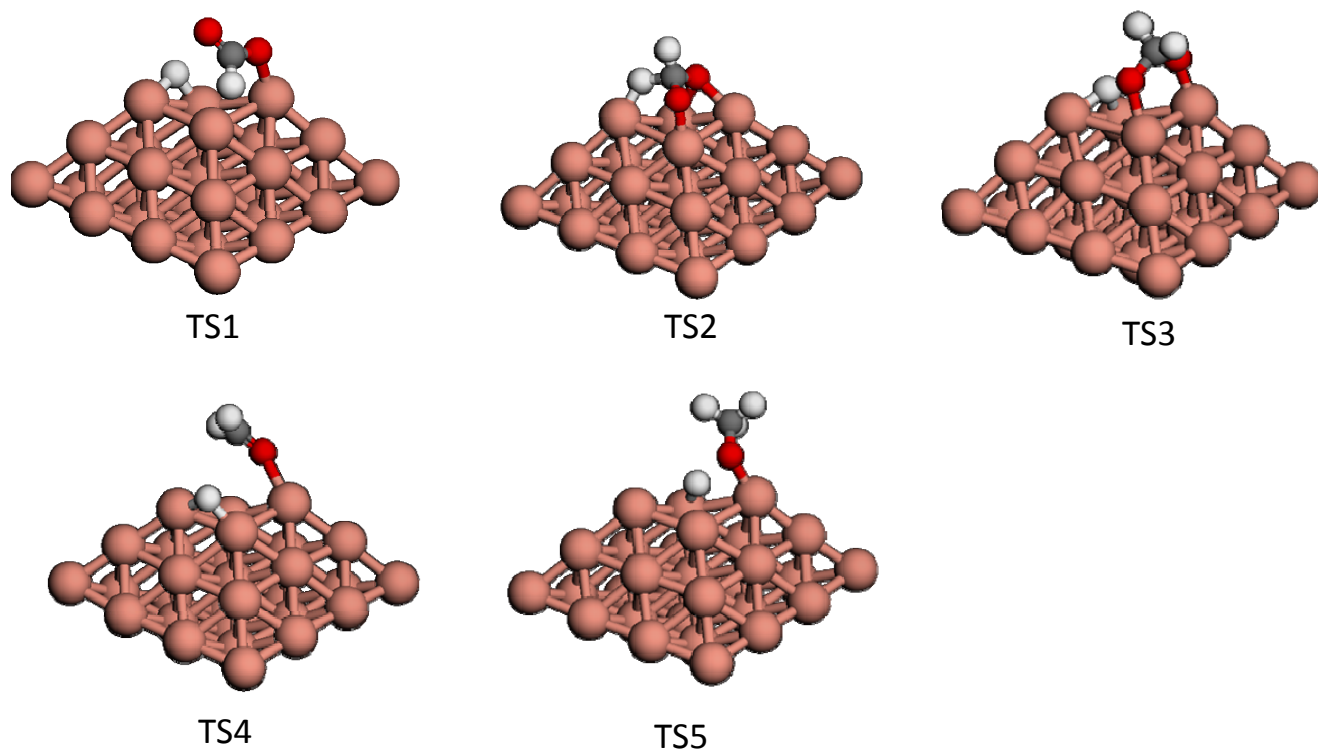

Figure S1. Structures of intermediates and transition states (TS) involved in the methanol synthesis reaction on the Cu<sub>29</sub> nanoparticle (Big brown: Cu; small white: H; small red: O; small grey: C)

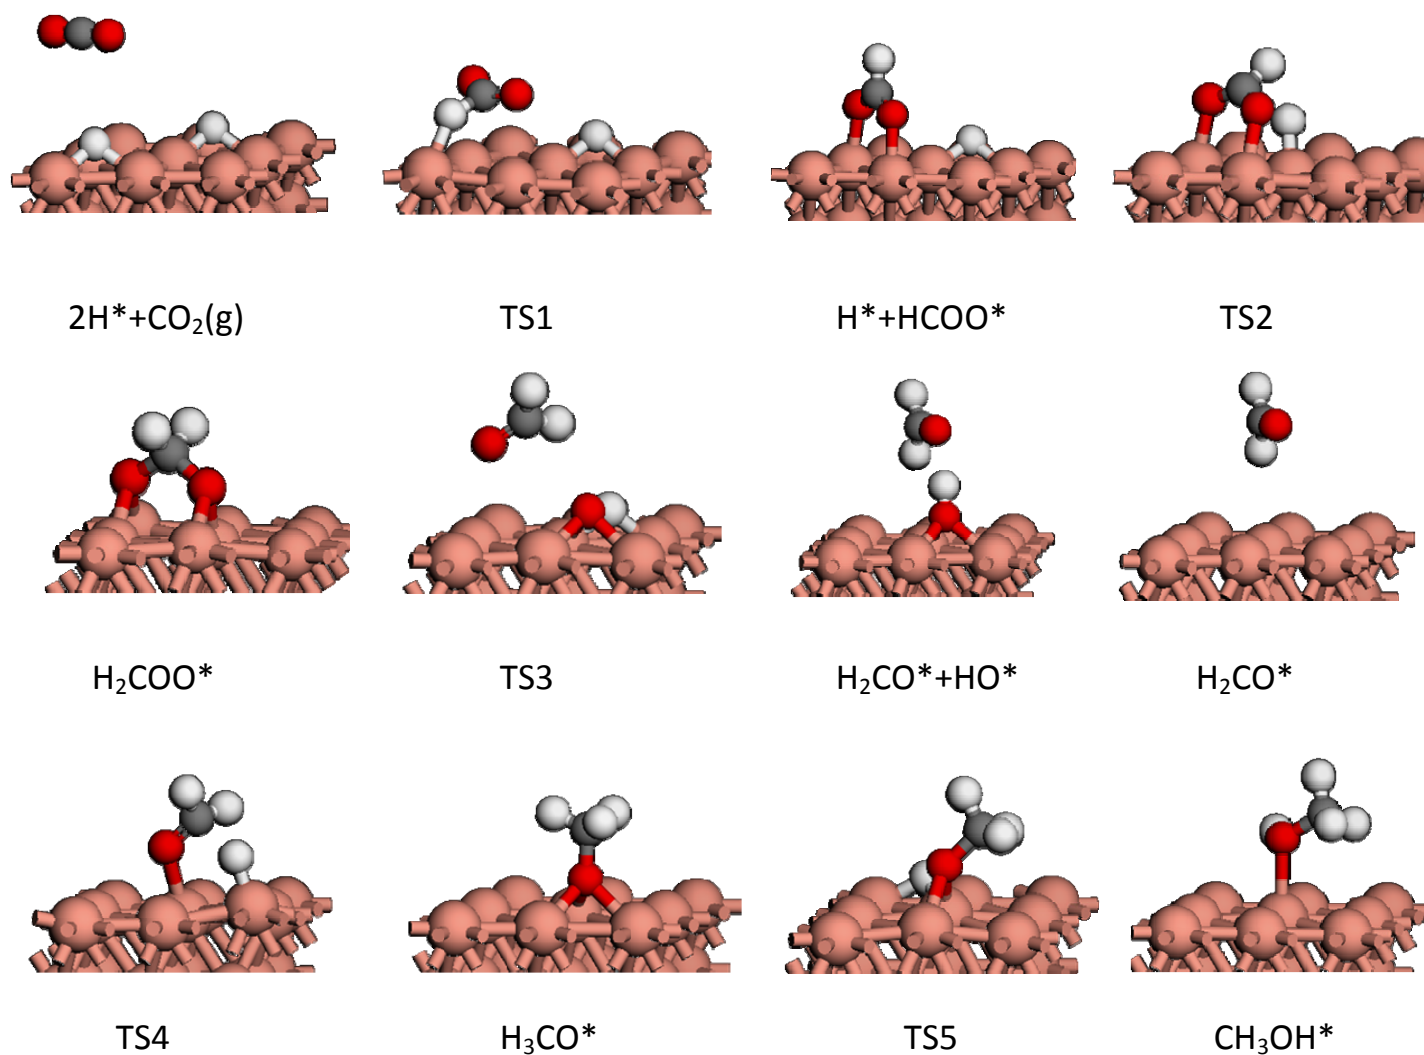

FIG. S2. Structures of intermediates and transition states (TS) involved in the methanol synthesis reaction on the Cu(111) surface (Big brown: Cu; small white: H; small red: O; small grey: C)
